# Supplementary material for: Dietary Balance Index-07 and the Risk of Anemia in Middle Aged and Elderly People in Southwest China: A Cross Sectional Study
Source: MDPI journal article supplement (doi:10.3390/nu10020162), 2018-01-31
Supplement: s1 [file s1]

**Table S1.** Components of Chinese dietary balance index revised (DBI-07).

| Components                  | Score      | Subgroup                             | Score       | Intake Range by Intake Level (kJ)                                |               |                         |                |                |                         |                |
|-----------------------------|------------|--------------------------------------|-------------|------------------------------------------------------------------|---------------|-------------------------|----------------|----------------|-------------------------|----------------|
|                             |            |                                      |             | 6700                                                             | 7550          | 8350                    | 9200           | 10,050         | 10,900                  | 11,700         |
| C1-Cereals*                 | (-12)–12   | Cereals                              | (-12)–12 ** | 0–49 = -8                                                        | 0–25g = -10   | <25 g = -12             | <25 g = -12    | <75 g = -12    | -12 < 125 g = -12       | <175 g = -12   |
|                             |            |                                      |             | 200–250 g = 0                                                    | 225–275 g = 0 | 275–325 g = 0           | 275–325 g = 0  | 325–375 g = 0  | 375–425 g = 0           | 425–475 g = 0  |
|                             |            |                                      |             | >500 g = 12                                                      | >525 g = 12   | >575 g = 12             | >575 g = 12    | >625 g = 12    | >675 g = 12             | >725 g = 12    |
| C2-Vegetables and Fruits    | (-12)–0    | Vegetables                           | (-6)–0      | ≥300 g = 0                                                       |               | ≥350 g = 0              | ≥400 g = 0     | ≥450 g = 0     | ≥500 g = 0              |                |
|                             |            |                                      |             | 150~299 g = -2                                                   |               | 175~249 g = -2          | 200~399 g = -2 | 225~449 g = -2 | 250~499 g = -2          |                |
|                             |            |                                      |             | 1~149 g = -4                                                     |               | 1~175g = -4             | 1~199 g = -4   | 1~225 g = -4   | 1~249 g = -4            |                |
|                             |            |                                      |             | 0 g = -6                                                         |               | 0 g = -6                | 0 g = -6       | 0 g = -6       | 0 g = -6                |                |
|                             |            | Fruits                               | (-6)–0      | ≥200 g = 0                                                       |               | ≥300 g = 0              |                | ≥400 g = 0     |                         | ≥500 g = 0     |
|                             |            |                                      |             | 100~199 g = -2                                                   |               | 150~299 g = -2          |                | 200~399 g = -2 |                         | 250~499 g = -2 |
|                             |            |                                      |             | 1~99 g = -4                                                      |               | 1~149g = -4             |                | 1~199 g = -4   |                         | 1~249 g = -4   |
|                             |            |                                      |             | 0 g = -6                                                         |               | 0 g = -6                |                | 0 g = -6       |                         | 0 g = -6       |
| C3-Milk and dairy products, | (-12)–0    | Dairy                                | (-6)–0      | ≥ 300 g = 0, score decreased 1 with intake amount decreased 50 g |               |                         |                |                |                         |                |
| Soybean and                 |            | Soybean                              | (-6)–0      | ≥30 g = 0, 15~29 g = -2                                          |               | ≥40 g = 0, 20~39 g = -2 |                |                | ≥50 g = 0, 25~49 g = -2 |                |
| soybean products            |            |                                      |             | 1~14 g = -4, 0 g = -6                                            |               | 1~19 g = -4, 0 g = -6   |                |                | 1~24 g = -4, 0 g = -6   |                |
| C4-Animal food              | (-12)–(-8) | Red meat, products, Poultry and game | (-4)–4      | 0 g = -4,                                                        |               |                         | 0 g = -4       |                |                         |                |
|                             |            |                                      |             | 1~25 g = -2                                                      |               |                         | 1~50 g = -2    |                |                         |                |
|                             |            |                                      |             | 25~75 g = 0                                                      |               |                         | 50~100 g = 0   |                |                         |                |
|                             |            |                                      |             | 75~125 g = 2                                                     |               |                         | 101~150 g = 2  |                |                         |                |
|                             |            |                                      |             | >125 g over = 4                                                  |               |                         | >150 g = 4     |                |                         |                |

|                                            |         |                   |                     |                                                                                       |                                                                                      |              |
|--------------------------------------------|---------|-------------------|---------------------|---------------------------------------------------------------------------------------|--------------------------------------------------------------------------------------|--------------|
|                                            |         |                   |                     | <20 g = -4                                                                            | <30 g = -4                                                                           | <40 g = -4   |
|                                            |         |                   |                     | 20~29 g = -3                                                                          | 30~44 g = -3                                                                         | 40~59 g = -3 |
|                                            |         |                   | Fish, and<br>shrimp | (-4)-0                                                                                | 30~39 g = -2                                                                         | 45~59 g = -2 |
|                                            |         |                   |                     |                                                                                       | 40~49 g = -1                                                                         | 60~79 g = -2 |
|                                            |         |                   |                     |                                                                                       | 60~74 g = -1                                                                         | 80~99 g = -1 |
|                                            |         |                   |                     |                                                                                       | ≥50 g = 0                                                                            | ≥75 g = 0    |
|                                            |         |                   |                     |                                                                                       |                                                                                      | ≥100 g = 0   |
|                                            |         |                   | Egg                 | (-4)-4                                                                                | >75 g = 4, 51~75 g = 2, 25~50 g = 0, 1~24 g = -2, 0 g = -4                           |              |
|                                            |         |                   | Cooking oil         | 0-4                                                                                   | ≤25 g = 0, 26~50 g = 2, > 50 g = 4                                                   |              |
|                                            |         |                   | Salt                | 0-4                                                                                   | ≤6 g = 0, 7~12 g = 2, >12 g = 4                                                      |              |
|                                            |         |                   |                     |                                                                                       |                                                                                      |              |
| C5-Condiments<br>and alcoholic<br>beverage | 0-12    |                   |                     |                                                                                       | Male: ≤25 g = 0, 26~50 g = 1, 51~75g = 2, 76-100g=3, >100g=4                         |              |
|                                            |         |                   | Alcohol<br>Beverage | 0-4                                                                                   | (25 g alcohol = 750 mL beer or 250 mL wine or 75 g liquor(<38°)or 50 g liquor(> 38°) |              |
|                                            |         |                   |                     |                                                                                       | Female: ≤15 g = 0, 15~30 g = 1, 31~45 g = 2, 46~60 g = 3, >60 g = 4                  |              |
|                                            |         |                   |                     |                                                                                       | (15 g alcohol = 450 mL beer or 150 mL wine or 50 g liquor(38°) or 30 g liquor(> 38°) |              |
| C6-Diet variety                            | (-12)-0 | Diet variety      | (-12)-0             | for consumption of greater than 25 g of foods (soybean is 5 g), otherwise score is -1 |                                                                                      |              |
| C7-Drinking water                          | (-12)-0 | Drinking<br>water | (-12)-0             | > 1200 mL = 0, <100 mL = -12                                                          |                                                                                      |              |
|                                            |         |                   |                     | score decreased 1 with intake amount decreased 100 mL from 0 to 12                    |                                                                                      |              |

\* Cereal include rice, wheat, dried legumes(exclude soybean) and tubers. Intake amount means fresh amount. Sweat potato: intake amount divided by 3 ;  
potato: intake amount divided by 4; yam and yambean: divided by 6; \*\* score increased (decreased) 2 with 50 g intake increased (decreased) from 0 to maximal(minimal) score

**Table S2.** Elements of diet variety score

| <b>Food subgroups</b>                                           | <b>Score</b> | <b>Representative foods</b>                                                                          |
|-----------------------------------------------------------------|--------------|------------------------------------------------------------------------------------------------------|
| F1-Rice and products                                            | -1,0         | Steamed/boiled rice, rice products                                                                   |
| F2-Wheat and products                                           | -1,0         | Wheat bun, wheat noodles, wheat pancake                                                              |
| F3-Corn, coarse grains and products, Starchy roots and products | -1,0         | Corn, barley grain, foxtail millet, buckwheat, sweet potato, yam, taro, potato, green bean, red bean |
| F4-Dark-colored vegetables                                      | -1,0         | Spinach, carrot, tomato                                                                              |
| F5-Light-colored vegetables                                     | -1,0         | Cabbage, cucumber, pickles                                                                           |
| F6-Fruits                                                       | -1,0         | Fresh and dried fruits                                                                               |
| F7-Soybean and products                                         | -1,0         | Soybean, black bean, bean curd                                                                       |
| F8-Milk and dairy products                                      | -1,0         | Milk, milk powder, cheese                                                                            |
| F9-Red meat and products                                        | -1,0         | Beef, pork, lamb, liver, sausage                                                                     |
| F10-Poultry and game                                            | -1,0         | Chicken, duck, rabbit                                                                                |
| F11-egg                                                         | -1,0         | Hen egg, duck egg                                                                                    |
| F12-Fish and seafood                                            | -1,0         | Fish, shrimp, mussel                                                                                 |

**Table S3.** The Dietary Guidelines for Chinese residence and the corresponding components for Diet Balance Index revised (DBI-07)

|    | Dietary guidelines for Chinese residents                                                                   | Corresponding component(s)<br>in the DBI-07 components |
|----|------------------------------------------------------------------------------------------------------------|--------------------------------------------------------|
| 1  | Eat a <b>variety</b> of foods, with cereals as the staple and include a certain amount of coarse grains    | Diet variety , cereals                                 |
| 2  | Consume <b>plenty</b> of vegetables, fruit and tubers                                                      | Vegetables and fruit                                   |
| 3  | Consume milk, soybean, or dairy- or their products <b>every day</b>                                        | Dairy , soybean                                        |
| 4  | Consume <b>appropriate</b> amounts of fish, poultry, eggs and lean meat;                                   | Animal food                                            |
| 5  | <b>Reduce</b> cooking oil, choose a light diet that is also low in salt.                                   | Cooking oil , salt                                     |
| 6  | Avoid over eating, exercise every day, to maintain a healthy body weight.                                  |                                                        |
| 7  | Rationally distribute the daily food intake among the three meals, if you take snacks, do so appropriately |                                                        |
| 8  | Drink <b>sufficient</b> water every day, rationally choose beverages                                       | Drinking water                                         |
| 9  | If you drink alcoholic beverages, do so in <b>limited</b> amounts                                          | Alcoholic beverages                                    |
| 10 | Avoid unsanitary and spoiled foods                                                                         |                                                        |
